# Supplementary material for: Plasmonic Ag decorated CdMoO4 as an efficient photocatalyst for solar hydrogen production
Source: Royal Society of Chemistry journal article supplement (doi:10.1039/c9ra05581a), 2019-01-01
Supplement: c9ra05581a1.pdf [file c9ra05581a1.pdf]

## Supporting Information

### Plasmonic Ag decorated CdMoO<sub>4</sub> as an efficient photocatalyst for solar hydrogen production

Yogesh A. Sethi,<sup>a</sup> Aniruddha K. Kulkarni,<sup>b</sup> Supriya K. Khore,<sup>a</sup> Rajendra P. Panmand,<sup>c</sup> Sandeep Kanade<sup>d</sup>, Suresh W. Gosavi,<sup>e</sup> Milind V. Kulkarni,<sup>a\*</sup> Bharat B. Kale<sup>a\*</sup>

ESI –SI Recyclability study of Photocatalytic hydrogen generation *via* H<sub>2</sub>O splitting by using sample CMAg-2

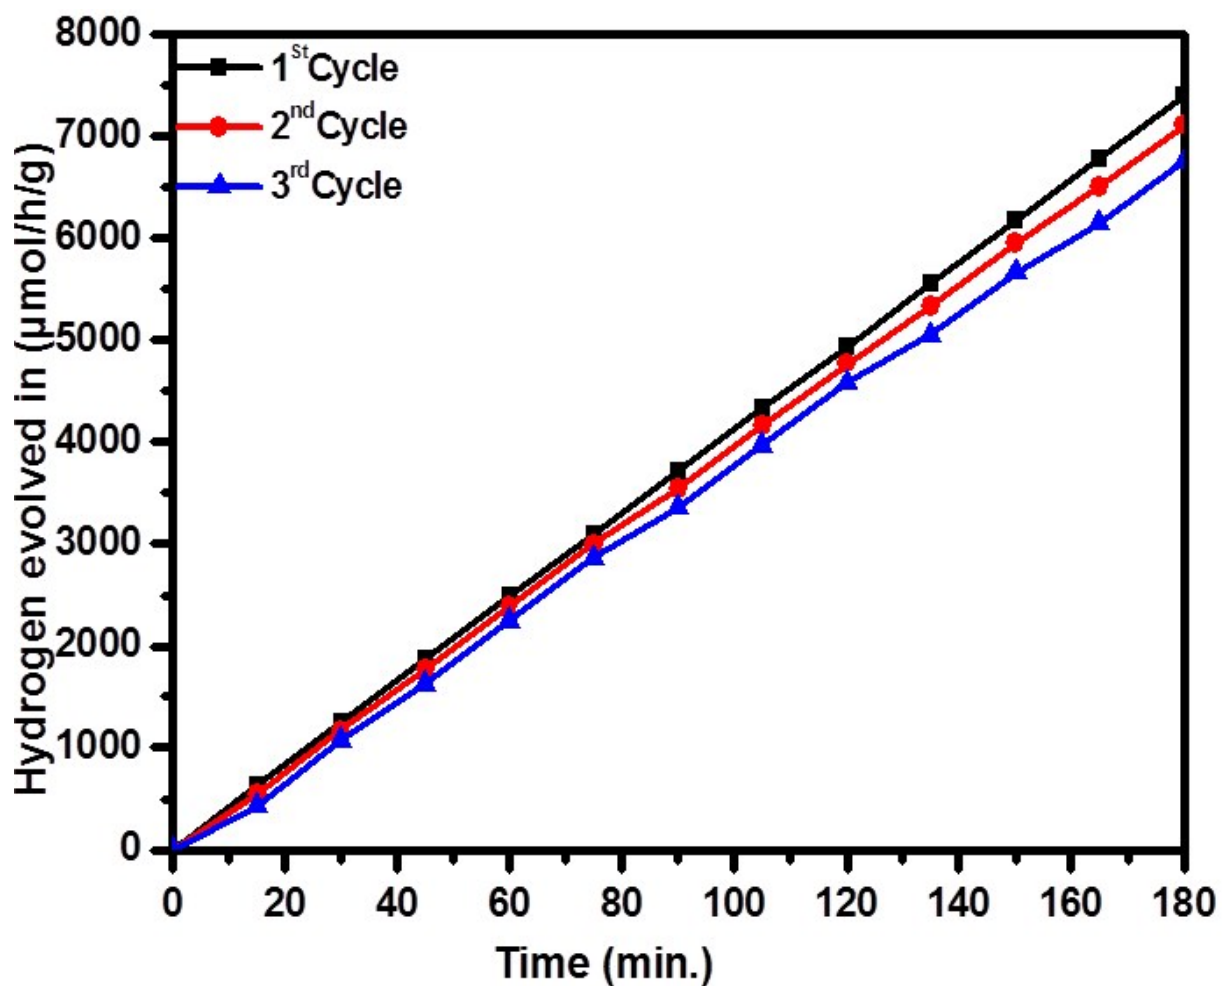

**Table S2: The H<sub>2</sub> generation rates for as synthesized CMAg-2**

| <b>Sample</b> | <b>Cycle</b>                | <b>H<sub>2</sub> evolution rate<br/>(<math>\mu\text{mol h}^{-1}\text{g}^{-1}</math>)</b> |
|---------------|-----------------------------|------------------------------------------------------------------------------------------|
| <b>CMAg-2</b> | <b>1<sup>st</sup> Cycle</b> | <b>2496</b>                                                                              |
| <b>CMAg-2</b> | <b>2<sup>nd</sup> Cycle</b> | <b>2428</b>                                                                              |
| <b>CMAg-2</b> | <b>3<sup>rd</sup> Cycle</b> | <b>2391</b>                                                                              |
